# Supplementary material for: Attributing land transport emissions to ozone and ozone precursorsin Europe and Germany
Source: Copernicus journal article supplement (doi:10.5194/acp-2019-715), 2019-09-13
Supplement: Supplementary file 3 [file acp-2019-715-supplement.zip]

# The Chemical Mechanism of SCAV

This document is part of the electronic supplement to our article  
“The 1-way on-line coupled model system MECO(n) – Part 4: Chemical evaluation (based on MESSy  
v2.52)”  
in Geosci. Model Dev. (2016), available at:  
<http://www.geosci-model-dev.net> (mechanism generated on 11.05.2015)

Table 1: Heterogeneous reactions

| #      | labels         | reaction                                   | rate coefficient                      | reference                                  |
|--------|----------------|--------------------------------------------|---------------------------------------|--------------------------------------------|
| H1000f | TrAraSc        | $O_2 \rightarrow O_2(aq)$                  | $k_{\text{exf}}(KPP\_O2)$             | see note                                   |
| H1000b | TrAraSc        | $O_2(aq) \rightarrow O_2$                  | $k_{\text{exb}}(KPP\_O2)$             | see note                                   |
| H1001f | TrAraMblScScm  | $O_3 \rightarrow O_3(aq)$                  | $k_{\text{exf}}(KPP\_O3)$             | see note                                   |
| H1001b | TrAraMblScScm  | $O_3(aq) \rightarrow O_3$                  | $k_{\text{exb}}(KPP\_O3)$             | see note                                   |
| H2100f | TrAraSc        | $OH \rightarrow OH(aq)$                    | $k_{\text{exf}}(KPP\_OH)$             | see note                                   |
| H2100b | TrAraSc        | $OH(aq) \rightarrow OH$                    | $k_{\text{exb}}(KPP\_OH)$             | see note                                   |
| H2101f | TrAraSc        | $HO_2 \rightarrow HO_2(aq)$                | $k_{\text{exf}}(KPP\_HO2)$            | see note                                   |
| H2101b | TrAraSc        | $HO_2(aq) \rightarrow HO_2$                | $k_{\text{exb}}(KPP\_HO2)$            | see note                                   |
| H2102f | TrAraMblScScm  | $H_2O_2 \rightarrow H_2O_2(aq)$            | $k_{\text{exf}}(KPP\_H2O2)$           | see note                                   |
| H2102b | TrAraMblScScm  | $H_2O_2(aq) \rightarrow H_2O_2$            | $k_{\text{exb}}(KPP\_H2O2)$           | see note                                   |
| H3100f | TrAraNSc       | $NO \rightarrow NO(aq)$                    | $k_{\text{exf}}(KPP\_NO)$             | see note                                   |
| H3100b | TrAraNSc       | $NO(aq) \rightarrow NO$                    | $k_{\text{exb}}(KPP\_NO)$             | see note                                   |
| H3101f | TrAraNSc       | $NO_2 \rightarrow NO_2(aq)$                | $k_{\text{exf}}(KPP\_NO2)$            | see note                                   |
| H3101b | TrAraNSc       | $NO_2(aq) \rightarrow NO_2$                | $k_{\text{exb}}(KPP\_NO2)$            | see note                                   |
| H3102f | TrAraNSc       | $NO_3 \rightarrow NO_3(aq)$                | $k_{\text{exf}}(KPP\_NO3)$            | see note                                   |
| H3102b | TrAraNSc       | $NO_3(aq) \rightarrow NO_3$                | $k_{\text{exb}}(KPP\_NO3)$            | see note                                   |
| H3200f | TrAraNMblScScm | $NH_3 \rightarrow NH_3(aq)$                | $k_{\text{exf}}(KPP\_NH3)$            | see note                                   |
| H3200b | TrAraNMblScScm | $NH_3(aq) \rightarrow NH_3$                | $k_{\text{exb}}(KPP\_NH3)$            | see note                                   |
| H3201  | TrAraMblNScScm | $N_2O_5 \rightarrow HNO_3(aq) + HNO_3(aq)$ | $k_{\text{exf\_N2O5}*C}(KPP\_H2O\_1)$ | Behnke et al. (1994), Behnke et al. (1997) |
| H3202f | TrAraNSc       | $HONO \rightarrow HONO(aq)$                | $k_{\text{exf}}(KPP\_HONO)$           | see note                                   |
| H3202b | TrAraNSc       | $HONO(aq) \rightarrow HONO$                | $k_{\text{exb}}(KPP\_HONO)$           | see note                                   |
| H3203f | TrAraMblNScScm | $HNO_3 \rightarrow HNO_3(aq)$              | $k_{\text{exf}}(KPP\_HNO3)$           | see note                                   |

Table 1: Heterogeneous reactions

| #      | labels          | reaction                                                                   | rate coefficient                                      | reference |
|--------|-----------------|----------------------------------------------------------------------------|-------------------------------------------------------|-----------|
| H3203b | TrAraMblNScScm  | $\text{HNO}_3(\text{aq}) \rightarrow \text{HNO}_3$                         | $k_{\text{exb}}(\text{KPP\_HNO}_3)$                   | see note  |
| H3204f | TrAraNSc        | $\text{HNO}_4 \rightarrow \text{HNO}_4(\text{aq})$                         | $k_{\text{exf}}(\text{KPP\_HNO}_4)$                   | see note  |
| H3204b | TrAraNSc        | $\text{HNO}_4(\text{aq}) \rightarrow \text{HNO}_4$                         | $k_{\text{exb}}(\text{KPP\_HNO}_4)$                   | see note  |
| H4100f | TrAraMblScScm   | $\text{CO}_2 \rightarrow \text{CO}_2(\text{aq})$                           | $k_{\text{exf}}(\text{KPP\_CO}_2)$                    | see note  |
| H4100b | TrAraMblScScm   | $\text{CO}_2(\text{aq}) \rightarrow \text{CO}_2$                           | $k_{\text{exb}}(\text{KPP\_CO}_2)$                    | see note  |
| H4101f | TrAraScScm      | $\text{HCHO} \rightarrow \text{HCHO}(\text{aq})$                           | $k_{\text{exf}}(\text{KPP\_HCHO})$                    | see note  |
| H4101b | TrAraScScm      | $\text{HCHO}(\text{aq}) \rightarrow \text{HCHO}$                           | $k_{\text{exb}}(\text{KPP\_HCHO})$                    | see note  |
| H4102f | TrAraSc         | $\text{CH}_3\text{O}_2 \rightarrow \text{CH}_3\text{OO}(\text{aq})$        | $k_{\text{exf}}(\text{KPP\_CH}_3\text{O}_2)$          | see note  |
| H4102b | TrAraSc         | $\text{CH}_3\text{OO}(\text{aq}) \rightarrow \text{CH}_3\text{O}_2$        | $k_{\text{exb}}(\text{KPP\_CH}_3\text{O}_2)$          | see note  |
| H4103f | TrAraScScm      | $\text{HCOOH} \rightarrow \text{HCOOH}(\text{aq})$                         | $k_{\text{exf}}(\text{KPP\_HCOOH})$                   | see note  |
| H4103b | TrAraScScm      | $\text{HCOOH}(\text{aq}) \rightarrow \text{HCOOH}$                         | $k_{\text{exb}}(\text{KPP\_HCOOH})$                   | see note  |
| H4104f | TrAraScScm      | $\text{CH}_3\text{OOH} \rightarrow \text{CH}_3\text{OOH}(\text{aq})$       | $k_{\text{exf}}(\text{KPP\_CH}_3\text{OOH})$          | see note  |
| H4104b | TrAraScScm      | $\text{CH}_3\text{OOH}(\text{aq}) \rightarrow \text{CH}_3\text{OOH}$       | $k_{\text{exb}}(\text{KPP\_CH}_3\text{OOH})$          | see note  |
| H4105f | TrAraSc         | $\text{CH}_3\text{OH} \rightarrow \text{CH}_3\text{OH}(\text{aq})$         | $k_{\text{exf}}(\text{KPP\_CH}_3\text{OH})$           | see note  |
| H4105b | TrAraSc         | $\text{CH}_3\text{OH}(\text{aq}) \rightarrow \text{CH}_3\text{OH}$         | $k_{\text{exb}}(\text{KPP\_CH}_3\text{OH})$           | see note  |
| H4200f | TrAraCScScm     | $\text{CH}_3\text{COOH} \rightarrow \text{CH}_3\text{COOH}(\text{aq})$     | $k_{\text{exf}}(\text{KPP\_CH}_3\text{CO}_2\text{H})$ | see note  |
| H4200b | TrAraCScScm     | $\text{CH}_3\text{COOH}(\text{aq}) \rightarrow \text{CH}_3\text{COOH}$     | $k_{\text{exb}}(\text{KPP\_CH}_3\text{CO}_2\text{H})$ | see note  |
| H4201f | TrAraCSc        | $\text{CH}_3\text{CHO} \rightarrow \text{CH}_3\text{CHO}(\text{aq})$       | $k_{\text{exf}}(\text{KPP\_CH}_3\text{CHO})$          | see note  |
| H4201b | TrAraCSc        | $\text{CH}_3\text{CHO}(\text{aq}) \rightarrow \text{CH}_3\text{CHO}$       | $k_{\text{exb}}(\text{KPP\_CH}_3\text{CHO})$          | see note  |
| H4202f | TrAraCSc        | $\text{PAN} \rightarrow \text{PAN}(\text{aq})$                             | $k_{\text{exf}}(\text{KPP\_PAN})$                     | see note  |
| H4202b | TrAraCSc        | $\text{PAN}(\text{aq}) \rightarrow \text{PAN}$                             | $k_{\text{exb}}(\text{KPP\_PAN})$                     | see note  |
| H4300f | TrAraCSc        | $\text{CH}_3\text{COCH}_3 \rightarrow \text{CH}_3\text{COCH}_3(\text{aq})$ | $k_{\text{exf}}(\text{KPP\_CH}_3\text{COCH}_3)$       | see note  |
| H4300b | TrAraCSc        | $\text{CH}_3\text{COCH}_3(\text{aq}) \rightarrow \text{CH}_3\text{COCH}_3$ | $k_{\text{exb}}(\text{KPP\_CH}_3\text{COCH}_3)$       | see note  |
| H6000f | TrAraClMblSc    | $\text{Cl}_2 \rightarrow \text{Cl}_2(\text{aq})$                           | $k_{\text{exf}}(\text{KPP\_Cl}_2)$                    | see note  |
| H6000b | TrAraClMblSc    | $\text{Cl}_2(\text{aq}) \rightarrow \text{Cl}_2$                           | $k_{\text{exb}}(\text{KPP\_Cl}_2)$                    | see note  |
| H6200f | TrAraClMblScScm | $\text{HCl} \rightarrow \text{HCl}(\text{aq})$                             | $k_{\text{exf}}(\text{KPP\_HCl})$                     | see note  |
| H6200b | TrAraClMblScScm | $\text{HCl}(\text{aq}) \rightarrow \text{HCl}$                             | $k_{\text{exb}}(\text{KPP\_HCl})$                     | see note  |
| H6201f | TrAraClMblSc    | $\text{HOCl} \rightarrow \text{HOCl}(\text{aq})$                           | $k_{\text{exf}}(\text{KPP\_HOCl})$                    | see note  |
| H6201b | TrAraClMblSc    | $\text{HOCl}(\text{aq}) \rightarrow \text{HOCl}$                           | $k_{\text{exb}}(\text{KPP\_HOCl})$                    | see note  |
| H7000f | TrAraBrMblSc    | $\text{Br}_2 \rightarrow \text{Br}_2(\text{aq})$                           | $k_{\text{exf}}(\text{KPP\_Br}_2)$                    | see note  |
| H7000b | TrAraBrMblSc    | $\text{Br}_2(\text{aq}) \rightarrow \text{Br}_2$                           | $k_{\text{exb}}(\text{KPP\_Br}_2)$                    | see note  |
| H7200f | TrAraBrMblScScm | $\text{HBr} \rightarrow \text{HBr}(\text{aq})$                             | $k_{\text{exf}}(\text{KPP\_HBr})$                     | see note  |
| H7200b | TrAraBrMblScScm | $\text{HBr}(\text{aq}) \rightarrow \text{HBr}$                             | $k_{\text{exb}}(\text{KPP\_HBr})$                     | see note  |
| H7201f | TrAraBrMblSc    | $\text{HOBr} \rightarrow \text{HOBr}(\text{aq})$                           | $k_{\text{exf}}(\text{KPP\_HOBr})$                    | see note  |
| H7201b | TrAraBrMblSc    | $\text{HOBr}(\text{aq}) \rightarrow \text{HOBr}$                           | $k_{\text{exb}}(\text{KPP\_HOBr})$                    | see note  |

Table 1: Heterogeneous reactions

| #      | labels         | reaction                                                                                                 | rate coefficient                      | reference |
|--------|----------------|----------------------------------------------------------------------------------------------------------|---------------------------------------|-----------|
| H7600f | TrAraClBrMblSc | $\text{BrCl} \rightarrow \text{BrCl(aq)}$                                                                | $k_{\text{exf}}(\text{KPP\_BrCl})$    | see note  |
| H7600b | TrAraClBrMblSc | $\text{BrCl(aq)} \rightarrow \text{BrCl}$                                                                | $k_{\text{exb}}(\text{KPP\_BrCl})$    | see note  |
| H9100f | TrAraSMblScScm | $\text{SO}_2 \rightarrow \text{SO}_2(\text{aq})$                                                         | $k_{\text{exf}}(\text{KPP\_SO2})$     | see note  |
| H9100b | TrAraSMblScScm | $\text{SO}_2(\text{aq}) \rightarrow \text{SO}_2$                                                         | $k_{\text{exb}}(\text{KPP\_SO2})$     | see note  |
| H9200  | TrAraSMblScScm | $\text{H}_2\text{SO}_4 \rightarrow \text{H}_2\text{SO}_4(\text{aq})$                                     | $k_{\text{exf}}(\text{KPP\_H2SO4})$   | see note  |
| H9400f | TrAraSSc       | $\text{DMSO} \rightarrow \text{DMSO(aq)}$                                                                | $k_{\text{exf}}(\text{KPP\_DMSO})$    | see note  |
| H9400b | TrAraSSc       | $\text{DMSO(aq)} \rightarrow \text{DMSO}$                                                                | $k_{\text{exb}}(\text{KPP\_DMSO})$    | see note  |
| H9401  | TrAraSMblSc    | $\text{CH}_3\text{SO}_3\text{H} \rightarrow \text{CH}_3\text{SO}_3^-(\text{aq}) + \text{H}^+(\text{aq})$ | $k_{\text{exf}}(\text{KPP\_CH3SO3H})$ | see note  |
| H9400f | TrAraSMblScScm | $\text{SO}_2\text{t} \rightarrow \text{SO}_2\text{t}$                                                    | $k_{\text{exf}}(\text{KPP\_SO2t})$    | see note  |
| H9400b | TrAraSMblScScm | $\text{SO}_2\text{t} \rightarrow \text{SO}_2\text{t}$                                                    | $k_{\text{exb}}(\text{KPP\_SO2t})$    | see note  |
| H9450f | TrAraSMblScScm | $\text{NH}_50\text{W} \rightarrow \text{NH}_50\text{W}$                                                  | $k_{\text{exf}}(\text{KPP\_NH50W})$   | see note  |
| H9450b | TrAraSMblScScm | $\text{NH}_50\text{W} \rightarrow \text{NH}_50\text{W}$                                                  | $k_{\text{exb}}(\text{KPP\_NH50W})$   | see note  |

\*Notes:

The forward ( $k_{\text{exf}}$ ) and backward ( $k_{\text{exb}}$ ) rate coefficients are calculated in the file `messy_scav_base.f90` using the accommodation coefficients in subroutine `scav_alpha` and Henry's law constants in subroutine `scav_henry`.

$k_{\text{mt}}$  = mass transfer coefficient

$\text{lwc}$  = liquid water content of aerosol mode

$f_{\text{het}}(X, Y) = k_{\text{mt}}(X) \times \text{lwc} \times f(Y)[Y]/\text{Het}_T$ , with  $f(\text{H}_2\text{O}) = 1$ ,  $f(\text{Cl}^-) = 5.0\text{E}2$ , and  $f(\text{Br}^-) = 3.0\text{E}5$ ,  $[Y]$  = concentration of Y;  $\text{Het}_T = [\text{H}_2\text{O}] + f(\text{Cl}^-)[\text{Cl}^-] + f(\text{Br}^-)[\text{Br}^-]$

H6301, H6302, H7601: The total uptake is determined by  $k_{\text{mt}}(\text{ClNO}_3)$ . The relative rates are assumed to be the same as for  $\text{N}_2\text{O}_5$  (H3201, H6300, H7300).

H7301, H7302, H7602: The total uptake is determined by  $k_{\text{mt}}(\text{BrNO}_3)$ . The relative rates are assumed to be the same as for  $\text{N}_2\text{O}_5$  (H3201, H6300, H7300).

Table 2: Acid-base and other equilibria

| #    | labels          | reaction                                                                         | $K_0[M^{m-n}]$ | $-\Delta H/R[K]$ | reference                           |
|------|-----------------|----------------------------------------------------------------------------------|----------------|------------------|-------------------------------------|
| EQ20 | TrAraSc         | $\text{HO}_2 \rightleftharpoons \text{O}_2^- + \text{H}^+$                       | 1.6E-5         |                  | Weinstein-Lloyd and Schwartz (1991) |
| EQ21 | TrAraMblScScm   | $\text{H}_2\text{O} \rightleftharpoons \text{H}^+ + \text{OH}^-$                 | 1.0E-16        | -6716            | Chameides (1984)                    |
| EQ30 | TrAraMblNScScm  | $\text{NH}_4^+ \rightleftharpoons \text{H}^+ + \text{NH}_3$                      | 5.88E-10       | -2391            | Chameides (1984)                    |
| EQ31 | TrAraNSc        | $\text{HONO} \rightleftharpoons \text{H}^+ + \text{NO}_2^-$                      | 5.1E-4         | -1260            | Schwartz and White (1981)           |
| EQ32 | TrAraMblNScScm  | $\text{HNO}_3 \rightleftharpoons \text{H}^+ + \text{NO}_3^-$                     | 15             | 8700             | Davis and de Bruin (1964)           |
| EQ33 | TrAraNSc        | $\text{HNO}_4 \rightleftharpoons \text{NO}_4^- + \text{H}^+$                     | 1.E-5          |                  | Warneck (1999)                      |
| EQ40 | TrAraMblScScm   | $\text{CO}_2 \rightleftharpoons \text{H}^+ + \text{HCO}_3^-$                     | 4.3E-7         | -913             | Chameides (1984)                    |
| EQ41 | TrAraScScm      | $\text{HCOOH} \rightleftharpoons \text{H}^+ + \text{HCOO}^-$                     | 1.8E-4         |                  | Weast (1980)                        |
| EQ42 | TrAraCScScm     | $\text{CH}_3\text{COOH} \rightleftharpoons \text{H}^+ + \text{CH}_3\text{COO}^-$ | 1.75E-5        | -46              | see note                            |
| EQ61 | TrAraClMblScScm | $\text{HCl} \rightleftharpoons \text{H}^+ + \text{Cl}^-$                         | 1.7E6          | 6896             | Marsh and McElroy (1985)            |
| EQ62 | TrAraClSc       | $\text{HOCl} \rightleftharpoons \text{H}^+ + \text{ClO}^-$                       | 3.2E-8         |                  | Lax (1969)                          |
| EQ71 | TrAraBrMblScScm | $\text{HBr} \rightleftharpoons \text{H}^+ + \text{Br}^-$                         | 1.0E9          |                  | Lax (1969)                          |
| EQ72 | TrAraBrSc       | $\text{HOBr} \rightleftharpoons \text{H}^+ + \text{BrO}^-$                       | 2.3E-9         | -3091            | Kelley and Tartar (1956)            |
| EQ90 | TrAraSMblScScm  | $\text{SO}_2 \rightleftharpoons \text{H}^+ + \text{HSO}_3^-$                     | 1.7E-2         | 2090             | Chameides (1984)                    |
| EQ91 | TrAraSMblScScm  | $\text{HSO}_3^- \rightleftharpoons \text{H}^+ + \text{SO}_3^{2-}$                | 6.0E-8         | 1120             | Chameides (1984)                    |
| EQ92 | TrAraSMblScScm  | $\text{HSO}_4^- \rightleftharpoons \text{H}^+ + \text{SO}_4^{2-}$                | 1.2E-2         | 2720             | Seinfeld and Pandis (1998)          |
| EQ93 | TrAraSMblScScm  | $\text{H}_2\text{SO}_4 \rightleftharpoons \text{H}^+ + \text{HSO}_4^-$           | 1.0E3          |                  | Seinfeld and Pandis (1998)          |

\*Notes:

EQ82 and EQ83: Thermodynamic calculations on the IBr/ICl equilibrium according to the data tables from Wagman et al. (1982):

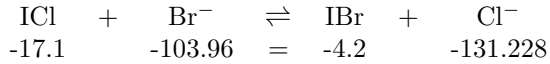

$$\frac{\Delta G}{[\text{kJ/mol}]} = -4.2 - 131.228 - (-17.1 - 103.96) = -14.368$$

$$K = \frac{[\text{IBr}] \times [\text{Cl}^-]}{[\text{ICl}] \times [\text{Br}^-]} = \exp\left(\frac{-\Delta G}{RT}\right) = \exp\left(\frac{14368}{8.314 \times 298}\right) = 330$$

This means we have equal amounts of IBr and ICl when the  $[\text{Cl}^-]/[\text{Br}^-]$  ratio equals 330.

Table 3: Aqueous phase reactions

| #      | labels         | reaction                                            | $k_0$ [ $M^{1-n}s^{-1}$ ] | $-E_a/R[K]$ | reference                       |
|--------|----------------|-----------------------------------------------------|---------------------------|-------------|---------------------------------|
| A1000  | TrAraSc        | $O_3 + O_2^- \rightarrow OH + OH^-$                 | 1.5E9                     |             | Sehested et al. (1983)          |
| A2100  | TrAraSc        | $OH + O_2^- \rightarrow OH^-$                       | 1.0E10                    |             | Sehested et al. (1968)          |
| A2101  | TrAraSc        | $OH + OH \rightarrow H_2O_2$                        | 5.5E9                     |             | Buxton et al. (1988)            |
| A2102  | TrAraSc        | $HO_2 + O_2^- \rightarrow H_2O_2 + OH^-$            | 1.0E8                     | -900        | Christensen and Sehested (1988) |
| A2103  | TrAraSc        | $HO_2 + OH \rightarrow H_2O$                        | 7.1E9                     |             | Sehested et al. (1968)          |
| A2104  | TrAraSc        | $HO_2 + HO_2 \rightarrow H_2O_2$                    | 9.7E5                     | -2500       | Christensen and Sehested (1988) |
| A2105  | TrAraSc        | $H_2O_2 + OH \rightarrow HO_2$                      | 2.7E7                     | -1684       | Christensen et al. (1982)       |
| A3100  | TrAraNSc       | $NO_2^- + O_3 \rightarrow NO_3^-$                   | 5.0E5                     | -6950       | Damschen and Martin (1983)      |
| A3101  | TrAraNSc       | $NO_2 + NO_2 \rightarrow HNO_3 + HONO$              | 1.0E8                     |             | Lee and Schwartz (1981)         |
| A3102  | TrAraNSc       | $NO_4^- \rightarrow NO_2^-$                         | 8.0E1                     |             | Warneck (1999)                  |
| A3200  | TrAraNSc       | $NO_2 + HO_2 \rightarrow HNO_4$                     | 1.8E9                     |             | Warneck (1999)                  |
| A3201  | TrAraNSc       | $NO_2^- + OH \rightarrow NO_2 + OH^-$               | 1.0E10                    |             | Wingenter et al. (1999)         |
| A3202  | TrAraNSc       | $NO_3 + OH^- \rightarrow NO_3^- + OH$               | 8.2E7                     | -2700       | Exner et al. (1992)             |
| A3203  | TrAraNSc       | $HONO + OH \rightarrow NO_2$                        | 1.0E10                    |             | Barker et al. (1970)            |
| A3204  | TrAraNSc       | $HONO + H_2O_2 \rightarrow HNO_3$                   | 4.6E3                     | -6800       | Damschen and Martin (1983)      |
| A4100  | TrAraSc        | $CO_3^- + O_2^- \rightarrow HCO_3^- + OH^-$         | 6.5E8                     |             | Ross et al. (1992)              |
| A4101  | TrAraSc        | $CO_3^- + H_2O_2 \rightarrow HCO_3^- + HO_2$        | 4.3E5                     |             | Ross et al. (1992)              |
| A4102  | TrAraSc        | $HCOO^- + CO_3^- \rightarrow 2 HCO_3^- + HO_2$      | 1.5E5                     |             | Ross et al. (1992)              |
| A4103  | TrAraSc        | $HCOO^- + OH \rightarrow OH^- + HO_2 + CO_2$        | 3.1E9                     | -1240       | Chin and Wine (1994)            |
| A4104  | TrAraSc        | $HCO_3^- + OH \rightarrow CO_3^-$                   | 8.5E6                     |             | Ross et al. (1992)              |
| A4105  | TrAraSc        | $HCHO + OH \rightarrow HCOOH + HO_2$                | 7.7E8                     | -1020       | Chin and Wine (1994)            |
| A4106  | TrAraSc        | $HCOOH + OH \rightarrow HO_2 + CO_2$                | 1.1E8                     | -991        | Chin and Wine (1994)            |
| A4107  | TrAraSc        | $CH_3OO + O_2^- \rightarrow CH_3OOH + OH^-$         | 5.0E7                     |             | Jacob (1986)                    |
| A4108  | TrAraSc        | $CH_3OO + HO_2 \rightarrow CH_3OOH$                 | 4.3E5                     |             | Jacob (1986)                    |
| A4109  | TrAraSc        | $CH_3OH + OH \rightarrow HCHO + HO_2$               | 9.7E8                     |             | Buxton et al. (1988)            |
| A4110a | TrAraSc        | $CH_3OOH + OH \rightarrow CH_3OO$                   | 2.7E7                     | -1715       | Jacob (1986)                    |
| A4110b | TrAraSc        | $CH_3OOH + OH \rightarrow HCHO + OH$                | 1.1E7                     | -1715       | Jacob (1986)                    |
| A9100  | TrAraSSc       | $SO_3^- + O_2 \rightarrow SO_5^-$                   | 1.5E9                     |             | Huie and Neta (1987)            |
| A9101  | TrAraSMblScScm | $SO_3^{2-} + O_3 \rightarrow SO_4^{2-}$             | 1.5E9                     | -5300       | Hoffmann (1986)                 |
| A9102  | TrAraSSc       | $SO_4^- + O_2^- \rightarrow SO_4^{2-}$              | 3.5E9                     |             | Jiang et al. (1992)             |
| A9103  | TrAraSSc       | $SO_4^- + SO_3^{2-} \rightarrow SO_3^- + SO_4^{2-}$ | 4.6E8                     |             | Huie and Neta (1987)            |
| A9104  | TrAraSSc       | $SO_5^- + O_2^- \rightarrow HSO_5^- + OH^-$         | 2.3E8                     |             | Buxton et al. (1996)            |
| A9200  | TrAraSSc       | $SO_3^{2-} + OH \rightarrow SO_3^- + OH^-$          | 5.5E9                     |             | Buxton et al. (1988)            |
| A9201  | TrAraSSc       | $SO_4^- + OH \rightarrow HSO_5^-$                   | 1.0E9                     |             | Jiang et al. (1992)             |

Table 3: Aqueous phase reactions (...continued)

| #     | labels         | reaction                                                 | $k_0 [M^{1-n}s^{-1}]$ | $-E_a/R[K]$ | reference                     |
|-------|----------------|----------------------------------------------------------|-----------------------|-------------|-------------------------------|
| A9202 | TrAraSSc       | $SO_4^- + HO_2 \rightarrow SO_4^{2-} + H^+$              | 3.5E9                 |             | Jiang et al. (1992)           |
| A9203 | TrAraSSc       | $SO_4^- + H_2O \rightarrow SO_4^{2-} + H^+ + OH$         | 1.1E1                 | -1110       | Herrmann et al. (1995)        |
| A9204 | TrAraSSc       | $SO_4^- + H_2O_2 \rightarrow SO_4^{2-} + H^+ + HO_2$     | 1.2E7                 |             | Wine et al. (1989)            |
| A9205 | TrAraSSc       | $HSO_3^- + O_2^- \rightarrow SO_4^{2-} + OH$             | 3.0E3                 |             | see note                      |
| A9206 | TrAraSMblScScm | $HSO_3^- + O_3 \rightarrow SO_4^{2-} + H^+$              | 3.7E5                 | -5500       | Hoffmann (1986)               |
| A9207 | TrAraSSc       | $HSO_3^- + OH \rightarrow SO_3^-$                        | 4.5E9                 |             | Buxton et al. (1988)          |
| A9208 | TrAraSSc       | $HSO_3^- + HO_2 \rightarrow SO_4^{2-} + OH + H^+$        | 3.0E3                 |             | see note                      |
| A9209 | TrAraSMblScScm | $HSO_3^- + H_2O_2 \rightarrow SO_4^{2-} + H^+$           | 5.2E6                 | -3650       | Martin and Damschen (1981)    |
| A9210 | TrAraSSc       | $HSO_3^- + SO_4^- \rightarrow SO_3^- + SO_4^{2-} + H^+$  | 8.0E8                 |             | Huie and Neta (1987)          |
| A9212 | TrAraSSc       | $HSO_3^- + HSO_5^- \rightarrow 2 SO_4^{2-} + 2 H^+$      | 7.1E6                 |             | Betterton and Hoffmann (1988) |
| A9300 | TrAraSSc       | $SO_3^{2-} + NO_2 \rightarrow SO_4^{2-} + 2 HONO - NO_2$ | 2.0E7                 |             | Clifton et al. (1988)         |
| A9301 | TrAraSSc       | $SO_4^- + NO_3^- \rightarrow SO_4^{2-} + NO_3$           | 5.0E4                 |             | Exner et al. (1992)           |
| A9302 | TrAraSSc       | $SO_4^{2-} + NO_3 \rightarrow NO_3^- + SO_4^-$           | 1.0E5                 |             | Logager et al. (1993)         |
| A9303 | TrAraSSc       | $HSO_3^- + NO_2 \rightarrow HSO_4^- + 2 HONO - NO_2$     | 2.0E7                 |             | Clifton et al. (1988)         |
| A9304 | TrAraSSc       | $HSO_3^- + NO_3 \rightarrow SO_3^- + NO_3^- + H^+$       | 1.4E9                 | -2000       | Exner et al. (1992)           |
| A9305 | TrAraSSc       | $HSO_3^- + HNO_4 \rightarrow HSO_4^- + NO_3^- + H^+$     | 3.1E5                 |             | Warneck (1999)                |
| A9400 | TrAraSSc       | $SO_3^{2-} + HCHO \rightarrow CH_2OH SO_3^- + OH^-$      | 1.4E4                 |             | Boyce and Hoffmann (1984)     |
| A9401 | TrAraSSc       | $SO_3^{2-} + CH_3OOH \rightarrow SO_4^{2-} + CH_3OH$     | 1.6E7                 | -3800       | Lind et al. (1987)            |
| A9402 | TrAraSSc       | $HSO_3^- + HCHO \rightarrow CH_2OH SO_3^-$               | 4.3E-1                |             | Boyce and Hoffmann (1984)     |
| A9403 | TrAraSSc       | $HSO_3^- + CH_3OOH \rightarrow SO_4^{2-} + H^+ + CH_3OH$ | 1.6E7                 | -3800       | Lind et al. (1987)            |
| A9404 | TrAraSSc       | $CH_2OH SO_3^- + OH^- \rightarrow SO_3^{2-} + HCHO$      | 3.6E3                 |             | Seinfeld and Pandis (1998)    |

A6102: Jacobi (1996) found an upper limit of 6E9 and cite an upper limit from another study of 2E9. Here, we set the rate coefficient to 1E9.

A6301: There is also an earlier study by Exner et al. (1992) which found a smaller rate coefficient but did not consider the back reaction.

A7400: assumed to be the same as for  $Br_2^- + H_2O_2$ .

A9106: see also: (Huie and Neta, 1987; Warneck, 1991). If this reaction produces a lot of  $SO_4^-$ , it will have an effect. However, we currently assume only the stable  $S_2O_8^{2-}$  as product.

A9205: D. Sedlak, pers. comm. (1993)

A9208: D. Sedlak, pers. comm. (1993)

A9105: The rate coefficient for the sum of the paths (leading to either  $HSO_5^-$  or  $SO_4^{2-}$ ) is from Huie and Neta (1987), the ratio 0.28/0.72 is from Deister and Warneck (1990).

A9605: assumed to be the same as for  $SO_3^{2-} + HOCl$ .

A9705: assumed to be the same as for  $SO_3^{2-} + HOBr$ .

Table 4: Photolysis reactions

| #      | labels   | reaction                                               | rate coefficient                    | reference |
|--------|----------|--------------------------------------------------------|-------------------------------------|-----------|
| PH2100 | TrAraScJ | $\text{H}_2\text{O}_2 + h\nu \rightarrow 2 \text{ OH}$ | $\text{JX}(\text{ip\_H202}) * 2.33$ | see note  |

\*Notes: J-values are calculated with an external module and then supplied to the SCAV chemistry

## References

- Barker, G. C., Fowles, P., and Stringer, B.: Pulse radiolytic induced transient electrical conductance in liquid solutions, *Trans. Faraday Soc.*, 66, 1509–1519, 1970.
- Behnke, W., Scheer, V., and Zetzsch, C.: Production of  $\text{BrNO}_2$ ,  $\text{Br}_2$  and  $\text{ClNO}_2$  from the reaction between sea spray aerosol and  $\text{N}_2\text{O}_5$ , *J. Aerosol Sci.*, 25, S277–S278, 1994.
- Behnke, W., George, C., Scheer, V., and Zetzsch, C.: Production and decay of  $\text{ClNO}_2$  from the reaction of gaseous  $\text{N}_2\text{O}_5$  with  $\text{NaCl}$  solution: Bulk and aerosol experiments, *J. Geophys. Res.*, 102D, 3795–3804, 1997.
- Betterton, E. A. and Hoffmann, M. R.: Oxidation of aqueous  $\text{SO}_2$  by peroxymonosulfate, *J. Phys. Chem.*, 92, 5962–5965, 1988.
- Boyce, S. D. and Hoffmann, M. R.: Kinetics and mechanism of the formation of hydroxymethanesulfonic acid at low pH, *J. Phys. Chem.*, 88, 4740–4746, 1984.
- Buxton, G. V., Greenstock, C. L., Helman, W. P., and Ross, A. B.: Critical review of rate constants for reactions of hydrated electrons, hydrogen atoms and hydroxyl radicals ( $\cdot\text{OH}/\cdot\text{O}^-$ ) in aqueous solution, *J. Phys. Chem. Ref. Data*, 17, 513–886, 1988.
- Buxton, G. V., McGowan, S., Salmon, G. A., Williams, J. E., and Wood, N. D.: A study of the spectra and reactivity of oxysulphur-radical anions involved in the chain oxidation of  $\text{S(IV)}$ : A pulse and  $\gamma$ -radiolysis study, *Atmos. Environ.*, 30, 2483–2493, 1996.
- Chameides, W. L.: The photochemistry of a remote marine stratiform cloud, *J. Geophys. Res.*, 89D, 4739–4755, 1984.
- Chin, M. and Wine, P. H.: A temperature-dependent competitive kinetics study of the aqueous-phase reactions of OH radicals with formate, formic acid, acetate, acetic acid, and hydrated formaldehyde, in: *Aquatic and Surface Photochemistry*, edited by Helz, G. R., Zepp, R. G., and Crosby, D. G., pp. 85–96, A. F. Lewis, NY, 1994.
- Christensen, H. and Sehested, K.:  $\text{HO}_2$  and  $\text{O}_2^-$  radicals at elevated temperatures, *J. Phys. Chem.*, 92, 3007–3011, 1988.
- Christensen, H., Sehested, K., and Corfitzen, H.: Reactions of hydroxyl radicals with hydrogen peroxide at ambient and elevated temperatures, *J. Phys. Chem.*, 86, 1588–1590, 1982.
- Clifton, C. L., Altstein, N., and Huie, R. E.: Rate constant for the reaction of  $\text{NO}_2$  with sulfur(IV) over the pH range 5.3–13, *Environ. Sci. Technol.*, 22, 586–589, 1988.
- Damschen, D. E. and Martin, L. R.: Aqueous aerosol oxidation of nitrous acid by  $\text{O}_2$ ,  $\text{O}_3$  and  $\text{H}_2\text{O}_2$ , *Atmos. Environ.*, 17, 2005–2011, 1983.
- Davis, Jr., W. and de Bruin, H. J.: New activity coefficients of 0–100 per cent aqueous nitric acid, *J. Inorg. Nucl. Chem.*, 26, 1069–1083, 1964.
- Deister, U. and Warneck, P.: Photooxidation of  $\text{SO}_3^{2-}$  in aqueous solution, *J. Phys. Chem.*, 94, 2191–2198, 1990.
- Exner, M., Herrmann, H., and Zellner, R.: Laser-based studies of reactions of the nitrate radical in aqueous solution, *Ber. Bunsenges. Phys. Chem.*, 96, 470–477, 1992.
- Herrmann, H., Reese, A., and Zellner, R.: Time resolved UV/VIS diode array absorption spectroscopy of  $\text{SO}_x^-$  ( $x=3, 4, 5$ ) radical anions in aqueous solution, *J. Mol. Struct.*, 348, 183–186, 1995.
- Hoffmann, M. R.: On the kinetics and mechanism of oxidation of aquated sulfur dioxide by ozone, *Atmos. Environ.*, 20, 1145–1154, 1986.
- Huie, R. E. and Neta, P.: Rate constants for some oxidations of  $\text{S(IV)}$  by radicals in aqueous solutions, *Atmos. Environ.*, 21, 1743–1747, 1987.
- Jacob, D. J.: Chemistry of OH in remote clouds and its role in the production of formic acid and peroxy-monosulfate, *J. Geophys. Res.*, 91D, 9807–9826, 1986.
- Jacobi, H.-W.: Kinetische Untersuchungen und Modellrechnungen zur troposphärischen Chemie von Radikalanionen und Ozon in wässriger Phase, Ph.D. thesis, Universität GH Essen, FRG, 1996.
- Jiang, P.-Y., Katsumura, Y., Nagaishi, R., Domae, M., Ishikawa, K., Ishigure, K., and Yoshida, Y.: Pulse radiolysis study of concentrated sulfuric acid solutions. Formation mechanism, yield and reactivity of sulfate radicals, *J. Chem. Soc. Faraday Trans.*, 88, 1653–1658, 1992.
- Kelley, C. M. and Tartar, H. V.: On the system: bromine-water, *J. Am. Chem. Soc.*, 78, 5752–5756, 1956.
- Lax, E.: *Taschenbuch für Chemiker und Physiker*, Springer Verlag, Berlin, 1969.
- Lee, Y.-N. and Schwartz, S. E.: Reaction kinetics of nitrogen dioxide with liquid water at low partial pressure, *J. Phys. Chem.*, 85, 840–848, 1981.
- Lind, J. A., Lazrus, A. L., and Kok, G. L.: Aqueous phase oxidation of sulfur(IV) by hydrogen peroxide, methylhydroperoxide, and peroxyacetic acid, *J. Geophys. Res.*, 92D, 4171–4177, 1987.

- Logager, T., Sehested, K., and Holcman, J.: Rate constants of the equilibrium reactions  $\text{SO}_4 + \text{HNO}_3 \rightleftharpoons \text{HSO}_4^- + \text{NO}_3$  and  $\text{SO}_4 + \text{NO}_3 \rightleftharpoons \text{SO}_4^{2-} + \text{NO}_3$ , *Radiat. Phys. Chem.*, 41, 539–543, 1993.
- Marsh, A. R. W. and McElroy, W. J.: The dissociation constant and Henry’s law constant of HCl in aqueous solution, *Atmos. Environ.*, 19, 1075–1080, 1985.
- Martin, L. R. and Damschen, D. E.: Aqueous oxidation of sulfur dioxide by hydrogen peroxide at low pH, *Atmos. Environ.*, 15, 1615–1621, 1981.
- Ross, A. B., Mallard, W. G., Helman, W. P., Bielski, B. H. J., Buxton, G. V., Cabelli, D. E., Greenstock, C. L., Huie, R. E., and Neta, P.: *NDRL-NIST Solution Kinetics Database: - Ver. 1*, National Institute of Standards and Technology, Gaithersburg, MD, 1992.
- Schwartz, S. E. and White, W. H.: Solubility equilibria of the nitrogen oxides and oxyacids in dilute aqueous solution, in: *Advances in Environmental Science and Engineering*, edited by Pfafflin, J. R. and Ziegler, E. N., vol. 4, pp. 1–45, Gordon and Breach Science Publishers, NY, 1981.
- Sehested, K., Rasmussen, O. L., and Fricke, H.: Rate constants of OH with  $\text{HO}_2$ ,  $\text{O}_2^-$ , and  $\text{H}_2\text{O}_2^+$  from hydrogen peroxide formation in pulse-irradiated oxygenated water, *J. Phys. Chem.*, 72, 626–631, 1968.
- Sehested, K., Holcman, J., and Hart, E. J.: Rate constants and products of the reactions of  $\text{e}_{\text{aq}}^-$ ,  $\text{O}_2^-$  and H with ozone in aqueous solutions, *J. Phys. Chem.*, 87, 1951–1954, 1983.
- Seinfeld, J. H. and Pandis, S. N.: *Atmospheric Chemistry and Physics*, John Wiley & Sons, Inc., 1998.
- Wagman, D. D., Evans, W. H., Parker, V. B., Schumm, R. H., Halow, I., Bailey, S. M., Churney, K. L., and Nuttall, R. L.: The NBS tables of chemical thermodynamic properties; Selected values for inorganic and  $\text{C}_1$  and  $\text{C}_2$  organic substances in SI units, *J. Phys. Chem. Ref. Data*, 11, suppl. 2, 1982.
- Warneck, P.: Chemical reactions in clouds, *Fresenius J. Anal. Chem.*, 340, 585–590, 1991.
- Warneck, P.: The relative importance of various pathways for the oxidation of sulfur dioxide and nitrogen dioxide in sunlit continental fair weather clouds, *Phys. Chem. Chem. Phys.*, 1, 5471–5483, 1999.
- Weast, R. C., ed.: *CRC Handbook of Chemistry and Physics*, 61st Edition, CRC Press, Inc., Boca Raton, FL, 1980.
- Weinstein-Lloyd, J. and Schwartz, S. E.: Low-intensity radiolysis study of free-radical reactions in cloudwater:  $\text{H}_2\text{O}_2$  production and destruction, *Environ. Sci. Technol.*, 25, 791–800, 1991.
- Wine, P. H., Tang, Y., Thorn, R. P., Wells, J. R., and Davis, D. D.: Kinetics of aqueous phase reactions of the  $\text{SO}_4^-$  radical with potential importance in cloud chemistry, *J. Geophys. Res.*, 94D, 1085–1094, 1989.
- Wingenter, O. W., Sive, B. C., Blake, N. J., and Rowland, F. S.: Atomic chlorine concentrations determined from ethane and hydroxyl measurements made over the Central Pacific Ocean, *Eos, Trans. AGU (Abstract Supplement)*, 80/46, F149–F150, 1999.
